# Supplementary material for: miRNA-mediated alteration of sulfatase modifying factor 1 expression using self-assembled branched DNA nanostructures
Source: Royal Society of Chemistry journal article supplement (doi:10.1039/d0ra10733f), 2021-01-01
Supplement: d0ra10733f1.pdf [file d0ra10733f1.pdf]

## Supplementary Information

### **miRNA-mediated alteration of Sulfatase Modifying Factor 1 expression using self-assembled branched DNA nanostructures**

**Kanchan Kumari<sup>1,2</sup>, Avishek Kar<sup>1</sup>, Ashok K. Nayak<sup>1</sup>, Sandip K. Mishra<sup>3</sup>, Umakanta Subudhi<sup>1,4,\*</sup>**

<sup>1</sup>DNA Nanotechnology & Application Laboratory, CSIR-Institute of Minerals & Materials Technology, Bhubaneswar, 751013, India

<sup>2</sup>Department of Molecular Biology, Umea University, Sweden.

<sup>3</sup>Cancer Biology Laboratory, Institute of Life Sciences, Bhubaneswar, 751023, India.

<sup>4</sup>Academy of Scientific & Innovative Research (AcSIR), Ghaziabad-201002, Uttar Pradesh, India.

#### **\* Corresponding author**

Dr Umakanta Subudhi, Senior Scientist,

DNA Nanotechnology & Application Laboratory, CSIR-Institute of Minerals & Materials Technology, Bhubaneswar, 751013.

Email id: [usubudhi@immt.res.in](mailto:usubudhi@immt.res.in), [subudhisai@gmail.com](mailto:subudhisai@gmail.com)

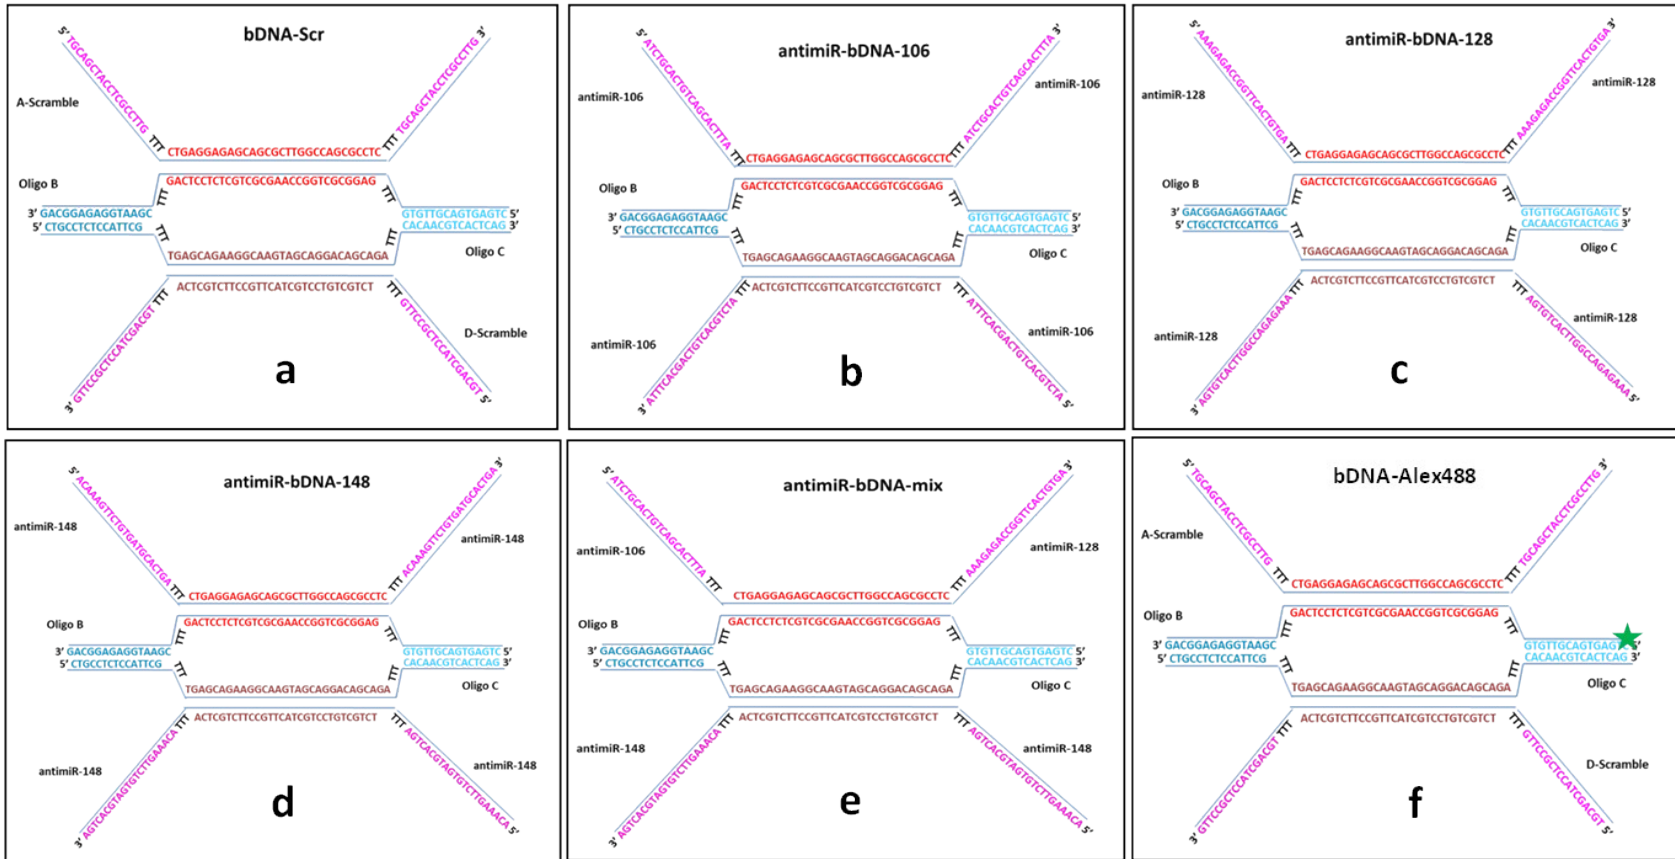

**Figure S1.** Schematic presentation of self-assembled branched DNA (bDNA) nanostructures containing (a) scramble sequences, (b) antimiR sequences of has-miR-106b-5p, (c) antimiR sequences of has-miR-128-3p, (d) antimiR sequences of has-miR-148b-3p, (e) antimiRNAs sequences of 106, 128 and duplicate sequence of antimiR-148 which named as antimiR-bDNA-mix and (f) bDNA-Alex488 having fluorescein labeled at the 5' end of the oligo B.

### 3'UTR Sequence of SUMF1: Length-998bp

>hg38\_knownGene\_ENST00000272902.10 range=chr3:4361146-4362143 5'pad=0  
3'pad=0 strand=- repeatMasking=none

CAACCAAGGAAAGTCTTCCCCAGTCCAAGGAGCAGTCGTGTCTGACCTAC  
ATTGGGCTTTTCTCAGAACTTTGAACGATCCCATGCAAAGAATTCCCACC  
CTGAGGTGGGTACATACTGCCAATGGCCAAAGGAACCGCCTTGTGAG  
ACCAAATTGCTGACCTGGGTGAGTGCATGTGCTTTATGGTGTGGTGCATC  
TTTGGAGATCATCACCATATTTACTTTTGAGAGTCTTTAAAGAGGAAGG  
GGAGTGGAGGGAACCCTGAGCTAGGCTTCAGGAGGCCCGCGTCTACGCA  
GGCTCTGCCACAGGGGTAGACCCCAGGTCCGACGCTTGACCTTCCTGGG  
CCTCAAGTGCCCTCCCCTATCAAATGAAGGGATGGACAGCATGACCTCTG  
GGTGTCTCTCCAACCTACCAGTTCTAAAAAGGGTATCAGATTCTATTGTG  
ACTTCATAGTGAGAATTTATTATAGATTATTTTTTTAGCTATTTTTTCCAT  
GTGTGAACCTTGAGTGATACTAATCATGTAAAGTAAGAGTTCTCTTATGT  
ATTATTTTCGGAAGAGGGGTGTGGTACTCCTTTATATTCGTACTIONACT  
TTGTTTTTCCAAGGAAATCAGTGTCTTTTACGTTGTTATGATGAATCCCA  
CATGGGGCCGGTGATGGTATGCTGAAGTTCAGCCGTTGAACACATAGGAA  
TGTCTGTGGGGTACTCTACTGTGCTTTATCTTTTAACATTAAGTGCCTT  
TGGTTCAGAGGGGCAGTCATAAGCTCTGTTTCCCCTCTCCCCAAAGCCT  
TCAGCGAACGTGAAATGTGCGCTAAACGGGGAAACCTGTTTAATTCTAGA  
TATAGGGAAAAAGGAACGAGGACCTTGAATGAGCTATATTCAGGGTATCC  
GGTATTTTGTAAATAGGGAATAGGAAACCTTGTGGCTGTGGAATATCCGA  
TGCTTTGAATCATGCACTGTGTTGAATAAACGTATCTGCTAAATCAGG

**Figure S2.** The nucleotide sequence of 3'UTR of SUMF1 used to study the miRNA binding sites.

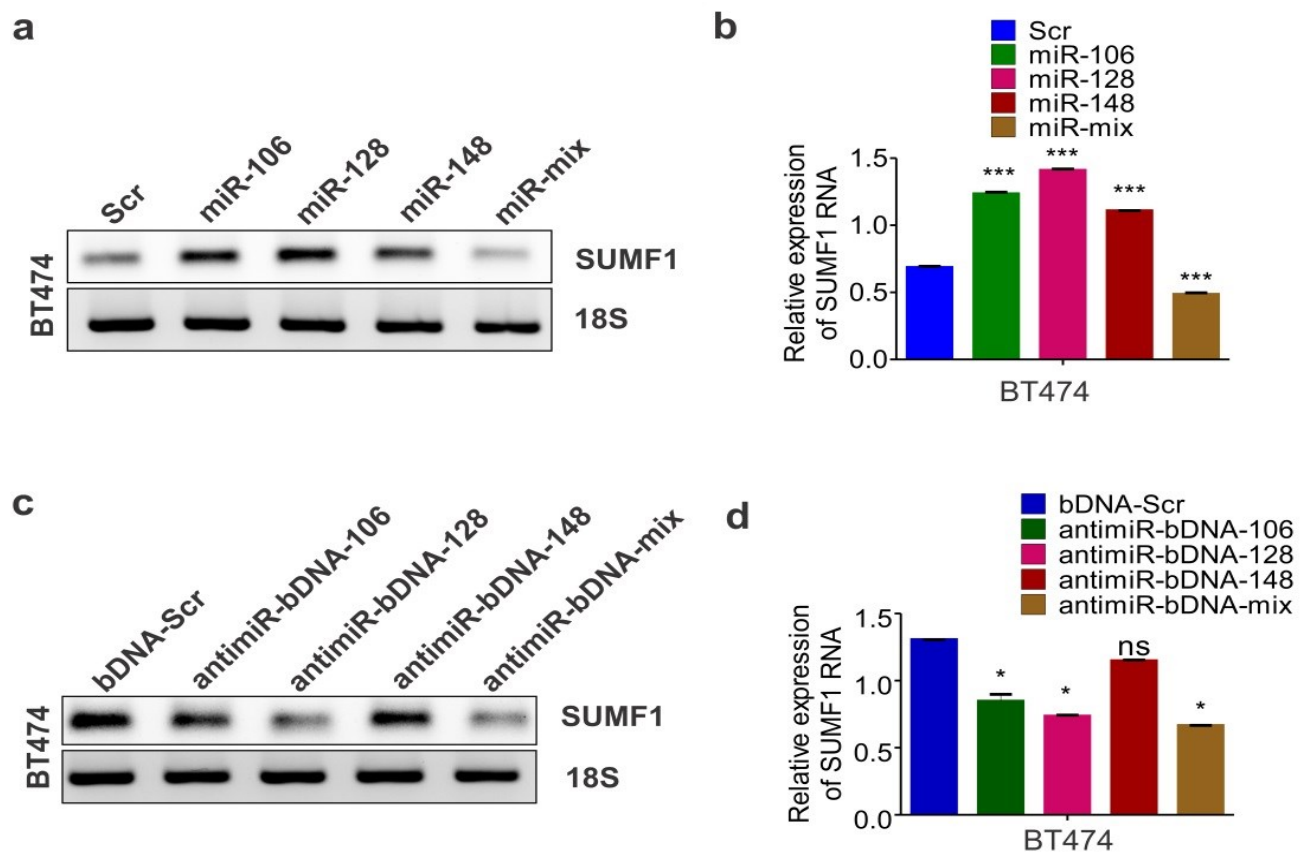

**Figure S3.** Expression of SUMF1 in BT474 upon transfection with (a,b) miRNA-106, 128 and 148 sequences and (b) bDNA structures containing anti-miR sequences for miRNA-106, 128 and 148 as observed in qRT-PCR.

**Table S1.** Sequence of oligonucleotides used in the study including the self-assembly of bDNA structures. Primer sequence for reverse transcription of miRNAs, real time primers for genes and miRNA, miRNA oligonucleotides for miRNAs and antimiRs.

| Sl. No. | Oligo name              | Sequences                                                                                | No. of nucleotides |
|---------|-------------------------|------------------------------------------------------------------------------------------|--------------------|
| 1       | scramble-A              | 5' TGCAGTACCTCGCCTTG TTT CTGAGGAGAGCAGCGCTTGGCCAGCGCCTC TTT TGCAGTACCTCGCCTTG 3'         | 72                 |
| 2       | oligo B                 | 5' CTGAGTGACGTTGTG TTT GAGGCGCTGGCCAAGCGCTGCTCTCCTCAG TTT CGAATGGAGAGGCAG 3'             | 66                 |
| 3       | Oligo B/Alex488N        | 5' Alex488N CTGAGTGACGTTGTG TTT GAGGCGCTGGCCAAGCGCTGCTCTCCTCAG TTT CGAATGGAGAGGCAG 3'    | 66                 |
| 4       | oligo C                 | 5' CTGCCTCTCCATTCG TTT TGAGCAGAAGGCAAGTAGCAGGACAGCAGA TTT CACAACGTCAGTCA 3'              | 66                 |
| 5       | scramble-D              | 5' TGCAGTACCTCGCCTTG TTT TCTGCTGTCCTGCTACTTGCCTTCTGCTCA TTT TGCAGTACCTCGCCTTG 3'         | 72                 |
| 6       | antimiR-106 & 128A      | 5' ATCTGCACTGTCAGCACTTTA TTT CTGAGGAGAGCAGCGCTTGGCCAGCGCCTC TTT AAAGAGACCGGTTCACTGTGA 3' | 78                 |
| 7       | antimiR-106 A           | 5' ATCTGCACTGTCAGCACTTTA TTT CTGAGGAGAGCAGCGCTTGGCCAGCGCCTC TTT ATCTGCACTGTCAGCACTTTA 3' | 78                 |
| 8       | antimiR-106D            | 5' ATCTGCACTGTCAGCACTTTA TTT TCTGCTGTCCTGCTACTTGCCTTCTGCTCA TTT ATCTGCACTGTCAGCACTTTA 3' | 78                 |
| 9       | antimiR-128A            | 5' AAAGAGACCGGTTCACTGTGA TTT CTGAGGAGAGCAGCGCTTGGCCAGCGCCTC TTT AAAGAGACCGGTTCACTGTGA 3' | 78                 |
| 10      | antimiR-128D            | 5' AAAGAGACCGGTTCACTGTGA TTT TCTGCTGTCCTGCTACTTGCCTTCTGCTCA TTT AAAGAGACCGGTTCACTGTGA 3' | 78                 |
| 11      | antimiR-148A            | 5' ACAAGTTCTGTGATGCACTGA TTT CTGAGGAGAGCAGCGCTTGGCCAGCGCCTC TTT ACAAGTTCTGTGATGCACTGA 3' | 80                 |
| 12      | antimiR-148D            | 5' ACAAGTTCTGTGATGCACTGA TTT TCTGCTGTCCTGCTACTTGCCTTCTGCTCA TTT ACAAGTTCTGTGATGCACTGA 3' | 80                 |
| 13      | hsa-miR-106b-5p(RvTs)   | 5' GTCGTATCCAGTGCAGGGTCCGAGGTATTCGCACTGGATACGAC ATCTGC 3'                                | 50                 |
| 14      | hsa-miR-128-3p (RvTs)   | 5' GTCGTATCCAGTGCAGGGTCCGAGGTATTCGCACTGGATACGACAAAGAG 3'                                 | 50                 |
| 15      | hsa-miR-148b-3p (RvTs)  | 5' GTCGTATCCAGTGCAGGGTCCGAGGTATTCGCACTGGATACGACACAAAG 3'                                 | 50                 |
| 16      | miR SL_Universal (RT-R) | 5' GTCGTATCCAGTGCAGGGT 3'                                                                | 21                 |
| 17      | hsa-miR-148b-3p (RT-F)  | 5' AACAGTGTGATGATCAGCACTCA 3'                                                            | 18                 |
| 18      | hsa-miR-106b-5p(RT-F)   | 5' AACACGTGTAAGTGCTGACA 3'                                                               | 20                 |
| 19      | hsa-miR-128-3p (RT-F)   | 5' AACAGTGTGATGATGATGATGAT 3'                                                            | 18                 |
| 20      | antimiR-106b-5p         | 5' ATCTGCACTGTCAGCACTTTA 3'                                                              | 21                 |
| 21      | antimiR-128-3p          | 5' AAAGAGACCGGTTCACTGTGA 3'                                                              | 21                 |
| 22      | antimiR-148b-3p         | 5' ACAAGTTCTGTGATGCACTGA 3'                                                              | 22                 |
| 23      | hsa-miR-148b-3p         | 5' TCAGTGCATCACAAGTTTGT 3'                                                               | 22                 |
| 24      | hsa-miR-106b-5p         | 5' TAAAGTGTGATGATGATGATGAT 3'                                                            | 21                 |
| 25      | hsa-miR-128-3p          | 5' TCACAGTGAACCGTCTCTTT 3'                                                               | 21                 |
| 26      | Scramble                | 5' TGCAGTACCTCGCCTTG 3'                                                                  | 18                 |
| 27      | SUMF1 F                 | 5' CCATCCCTGCTGGAGTA 3'                                                                  | 17                 |
| 28      | SUMF1 R                 | 5' GGTCCTCACTGCTCACTC 3'                                                                 | 19                 |
| 29      | 18S RNA F               | 5' GTAACCCGTTGAACCCATT 3'                                                                | 20                 |
| 30      | 18S RNA R               | 5' CCATCCAATCGGTAGTAGCG 3'                                                               | 20                 |

**Table S2.** AllGenPromo-based analysis for identifying binding sites of important transcription factors at 3kb upstream promoter of SUMF1. Factors predicted within a dissimilarity margin less than or equal to 15%.

|     |                                     |     |                                        |     |                                          |     |                                                 |     |                                             |     |                                    |     |                                               |     |                                               |
|-----|-------------------------------------|-----|----------------------------------------|-----|------------------------------------------|-----|-------------------------------------------------|-----|---------------------------------------------|-----|------------------------------------|-----|-----------------------------------------------|-----|-----------------------------------------------|
| 0   | <a href="#">C/TL1</a> [T00100]      | 1   | <a href="#">HNF-1B</a> [T01950]        | 2   | <a href="#">HNF-1C</a> [T01951]          | 3   | <a href="#">USF2b</a> [T02377]                  | 4   | <a href="#">OC-2</a> [T03259]               | 5   | <a href="#">oJun</a> [T00133]      | 6   | <a href="#">HNF-3beta</a> [T02513]            | 7   | <a href="#">SRV</a> [T00997]                  |
| 8   | <a href="#">LCR-F1</a> [T01599]     | 9   | <a href="#">p300</a> [T01427]          | 10  | <a href="#">B47</a> [T00207]             | 11  | <a href="#">EIk-1</a> [T00250]                  | 12  | <a href="#">TCF-1A</a> [T00999]             | 13  | <a href="#">LEF-1</a> [T02905]     | 14  | <a href="#">TCF-4E</a> [T02878]               | 15  | <a href="#">HMG I(Y)</a> [T02368]             |
| 16  | <a href="#">STAT4</a> [T01577]      | 17  | <a href="#">oEts-1</a> [T00112]        | 18  | <a href="#">R2</a> [T00712]              | 19  | <a href="#">P/box binding factor</a> [T00704]   | 20  | <a href="#">HOXD9</a> [T01424]              | 21  | <a href="#">HOXD10</a> [T01425]    | 22  | <a href="#">GATA-1</a> [T00306]               | 23  | <a href="#">GATA-3</a> [T00311]               |
| 24  | <a href="#">PR-B</a> [T00696]       | 25  | <a href="#">PRA</a> [T01661]           | 26  | <a href="#">GR-alpha</a> [T00337]        | 27  | <a href="#">POU3F2</a> [T00630]                 | 28  | <a href="#">TGIF</a> [T04076]               | 29  | <a href="#">oFos</a> [T00123]      | 30  | <a href="#">Pax-2</a> [T01823]                | 31  | <a href="#">AP-2alphaA</a> [T00035]           |
| 32  | <a href="#">TBP</a> [T00794]        | 33  | <a href="#">TMF</a> [T00835]           | 34  | <a href="#">GR-beta</a> [T01920]         | 35  | <a href="#">POU2F2 (Oct-2.1)</a> [T00646]       | 36  | <a href="#">DBP</a> [T04875]                | 37  | <a href="#">CDX2</a> [T03246]      | 38  | <a href="#">FOXP3</a> [T04280]                | 39  | <a href="#">TFIID</a> [T00820]                |
| 40  | <a href="#">STAT3A</a> [T04683]     | 41  | <a href="#">oEts-2</a> [T00113]        | 42  | <a href="#">Ctcf-1</a> [T03978]          | 43  | <a href="#">NF-AT4</a> [T01946]                 | 44  | <a href="#">NF-AT3</a> [T02462]             | 45  | <a href="#">RelA</a> [T00594]      | 46  | <a href="#">HSE1 (long)</a> [T01042]          | 47  | <a href="#">HSE1 (short)</a> [T02104]         |
| 48  | <a href="#">HNF-3alpha</a> [T02512] | 49  | <a href="#">Nkx2-1</a> [T00857]        | 50  | <a href="#">TFIIB</a> [T00818]           | 51  | <a href="#">NF-X3</a> [T01514]                  | 52  | <a href="#">Oct-B1</a> [T00545]             | 53  | <a href="#">POU2F2B</a> [T00662]   | 54  | <a href="#">C/EBPalpha</a> [T00105]           | 55  | <a href="#">C/EBPbeta</a> [T00581]            |
| 56  | <a href="#">LF-A1</a> [T00467]      | 57  | <a href="#">ROREalpha1</a> [T01527]    | 58  | <a href="#">COUP-TE1</a> [T00149]        | 59  | <a href="#">ER-beta</a> [T04651]                | 60  | <a href="#">RAR-beta</a> [T00721]           | 61  | <a href="#">SF-1</a> [T02769]      | 62  | <a href="#">ER-alpha</a> [T00261]             | 63  | <a href="#">FOU6E1</a> [T04470]               |
| 64  | <a href="#">POU2F2C</a> [T00665]    | 65  | <a href="#">ENKTF-1</a> [T00255]       | 66  | <a href="#">HNF-1A</a> [T00368]          | 67  | <a href="#">NFdeltaE3A</a> [T00976]             | 68  | <a href="#">AML1</a> [T01067]               | 69  | <a href="#">AML1a</a> [T02256]     | 70  | <a href="#">AP-4</a> [T00036]                 | 71  | <a href="#">WT1.1</a> [T01840]                |
| 72  | <a href="#">AP-3 (2)</a> [T00039]   | 73  | <a href="#">NHP-1</a> [T00621]         | 74  | <a href="#">E1aE-A</a> [T00246]          | 75  | <a href="#">FOXO3a</a> [T02938]                 | 76  | <a href="#">Hif</a> [T01071]                | 77  | <a href="#">Pbx1b</a> [T02087]     | 78  | <a href="#">NF-1</a> [T00539]                 | 79  | <a href="#">T3R-beta1</a> [T00851]            |
| 80  | <a href="#">YY1</a> [T00915]        | 81  | <a href="#">TCF-4</a> [T02918]         | 82  | <a href="#">RXR-1:RXR-alpha</a> [T05671] | 83  | <a href="#">T3R-alpha1</a> [T01152]             | 84  | <a href="#">Myf-3</a> [T00519]              | 85  | <a href="#">MyoD</a> [T00525]      | 86  | <a href="#">USF2</a> [T00878]                 | 87  | <a href="#">AR</a> [T00040]                   |
| 88  | <a href="#">RAR-alpha1</a> [T00719] | 89  | <a href="#">ARP-1</a> [T00045]         | 90  | <a href="#">RXR-alpha</a> [T01345]       | 91  | <a href="#">MRF-2</a> [T04675]                  | 92  | <a href="#">AIRE</a> [T05990]               | 93  | <a href="#">Nkx3-1</a> [T04255]    | 94  | <a href="#">NF1/CTF</a> [T00094]              | 95  | <a href="#">Pax-6</a> [T01122]                |
| 96  | <a href="#">oMyh</a> [T00137]       | 97  | <a href="#">AP-1</a> [T00029]          | 98  | <a href="#">RAR-gamma</a> [T00720]       | 99  | <a href="#">IRF-2</a> [T01491]                  | 100 | <a href="#">p53</a> [T00671]                | 101 | <a href="#">TGT3</a> [T00833]      | 102 | <a href="#">FOXJ2 (long isoform)</a> [T04169] | 103 | <a href="#">NF-Y</a> [T00150]                 |
| 104 | <a href="#">Nrf2</a> [T01443]       | 105 | <a href="#">POU2F1</a> [T00641]        | 106 | <a href="#">POU2F2</a> [T00647]          | 107 | <a href="#">octamer-binding factor</a> [T01225] | 108 | <a href="#">MZF-1</a> [T00529]              | 109 | <a href="#">NF-AT2</a> [T01945]    | 110 | <a href="#">NF-AT1</a> [T01948]               | 111 | <a href="#">STAT1beta</a> [T01573]            |
| 112 | <a href="#">MBF1</a> [T00492]       | 113 | <a href="#">SKR:RXR-alpha</a> [T05670] | 114 | <a href="#">Myf-5</a> [T00521]           | 115 | <a href="#">Tal-1</a> [T00790]                  | 116 | <a href="#">RAR-beta:RXR-alpha</a> [T05420] | 117 | <a href="#">WT1.1-KTS</a> [T00900] | 118 | <a href="#">WT1-KTS</a> [T01839]              | 119 | <a href="#">E2F-1:DP-1</a> [T05204]           |
| 120 | <a href="#">HTEB3</a> [T05051]      | 121 | <a href="#">Aml1</a> [T01346]          | 122 | <a href="#">LSE1</a> [T00874]            | 123 | <a href="#">AhR</a> [T01795]                    | 124 | <a href="#">Pax-5</a> [T00070]              | 125 | <a href="#">AhR:Arnt</a> [T05394]  | 126 | <a href="#">Chx10</a> [T04139]                | 127 | <a href="#">VDR</a> [T00885]                  |
| 128 | <a href="#">PEA3</a> [T00685]       | 129 | <a href="#">DP-1</a> [T01548]          | 130 | <a href="#">E2F-1</a> [T01542]           | 131 | <a href="#">HNF-4alpha</a> [T03828]             | 132 | <a href="#">RPS8</a> [T05040]               | 133 | <a href="#">Sp1</a> [T00759]       | 134 | <a href="#">CREMalpha</a> [T01803]            | 135 | <a href="#">ATF</a> [T00051]                  |
| 136 | <a href="#">ATF-1</a> [T00868]      | 137 | <a href="#">E2F</a> [T00221]           | 138 | <a href="#">AREB6</a> [T00625]           | 139 | <a href="#">REX1</a> [T01673]                   | 140 | <a href="#">Fra-1</a> [T01462]              | 141 | <a href="#">JunD</a> [T01978]      | 142 | <a href="#">Sp3</a> [T02338]                  | 143 | <a href="#">oMyc</a> [T00140]                 |
| 144 | <a href="#">DEC1</a> [T05838]       | 145 | <a href="#">ETF</a> [T00270]           | 146 | <a href="#">E2F-5</a> [T01607]           | 147 | <a href="#">HOX11</a> [T02054]                  | 148 | <a href="#">CREB</a> [T00163]               | 149 | <a href="#">ATF-2</a> [T00167]     | 150 | <a href="#">aMEF-2</a> [T01006]               | 151 | <a href="#">PPAR-alpha:RXR-alpha</a> [T05221] |
| 152 | <a href="#">Ik-1</a> [T02702]       | 153 | <a href="#">XBP-1</a> [T00902]         | 154 | <a href="#">ANF</a> [T00025]             | 155 | <a href="#">FOXJ1</a> [T02474]                  | 156 | <a href="#">TFII-I</a> [T00824]             | 157 | <a href="#">WT1</a> [T00899]       | 158 | <a href="#">GATA-2</a> [T00308]               | 159 | <a href="#">IRF-1</a> [T00423]                |
| 160 | <a href="#">IRF-3</a> [T04673]      | 161 | <a href="#">NF-AT1</a> [T00550]        | 162 | <a href="#">Egr3</a> [T00243]            | 163 | <a href="#">CRF</a> [T00170]                    | 164 | <a href="#">Pbx1</a> [T06000]               | 165 | <a href="#">CTE</a> [T00174]       | 166 | <a href="#">PKNOX1</a> [T04122]               | 167 | <a href="#">IPF1</a> [T04362]                 |
| 168 | <a href="#">E4F1</a> [T00223]       | 169 | <a href="#">ROREalpha2</a> [T01528]    | 170 | <a href="#">E2</a> [T00204]              | 171 | <a href="#">NF-E2</a> [T00558]                  | 172 | <a href="#">B4F</a> [T00222]                | 173 | <a href="#">T3R-alpha</a> [T00838] | 174 | <a href="#">ERREalpha1</a> [T05682]           | 175 | <a href="#">RAR-beta2</a> [T01326]            |
